# Supplementary material for: Definition of the contribution of an Osteopontin-producing CD11c+ microglial subset to Alzheimer’s disease
Source: PubMed Central journal article supplement — Proc Natl Acad Sci U S A. 2023 Feb 2;120(6):e2218915120. doi: 10.1073/pnas.2218915120 (PMC9963365; doi:10.1073/pnas.2218915120), 2023-02-02
Supplement: pnas.2218915120.sapp.pdf [file pnas.2218915120.sapp.pdf]

## **Supporting Information Appendix**

### **Definition of the contribution of an Osteopontin-producing CD11c<sup>+</sup> microglial subset to Alzheimer's disease**

Yiguo Qiu, Xianli Shen, Orly Ravid, Dana Atrakchi, Daniel Rand, Andrew E. Wight, Hye-Jung Kim, Sigal Liraz-Zaltsman, Itzik Cooper, Michal Schnaider Beerli and Harvey Cantor

Correspondence to: [Harvey\\_Cantor@dfci.harvard.edu](mailto:Harvey_Cantor@dfci.harvard.edu)

#### **This PDF file includes:**

Figures S1 – S8

Tables S1 + S2

#### **Other Supplementary Materials for this manuscript include the following:**

Dataset S1

Movies S1 and S2

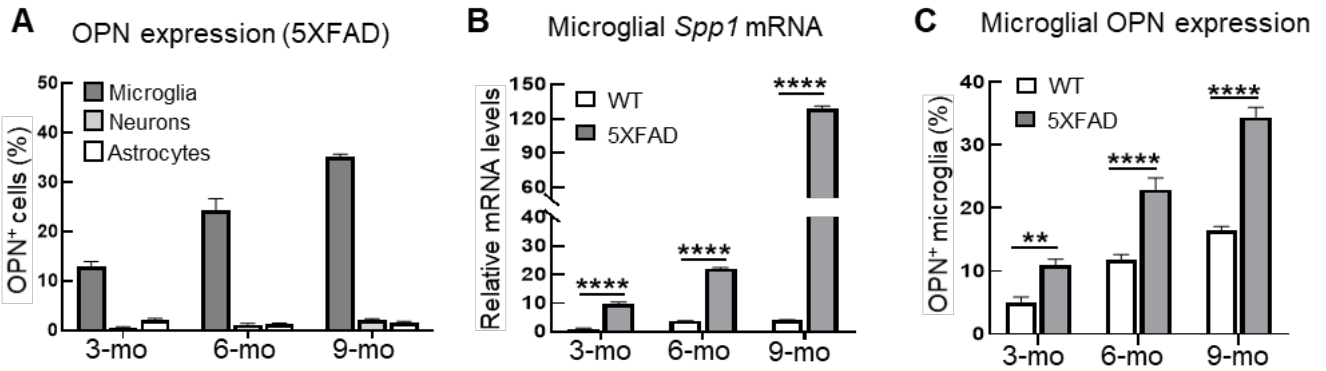

**Figure S1. Microglial expression of OPN in 5XFAD mice.**

**(A)** Flow cytometric analysis of OPN expression in microglia (CD11b<sup>+</sup>), astrocytes (GFAP<sup>+</sup>) and neurons (MAP2<sup>+</sup>) obtained from 5XFAD mice (n=3) at different stages of disease development.

**(B, C)** Microglial OPN expression at the mRNA level (RT-qPCR) (n=4) and protein level (n=6) was analyzed by flow cytometry in 5XFAD mice compared with age-matched WT mice at the indicated ages during disease progression. \*\*\*\*p < 0.0001, \*\*p < 0.01 by two-way ANOVA with Bonferroni's multiple comparisons test. Data are presented as mean ± s.e.m.

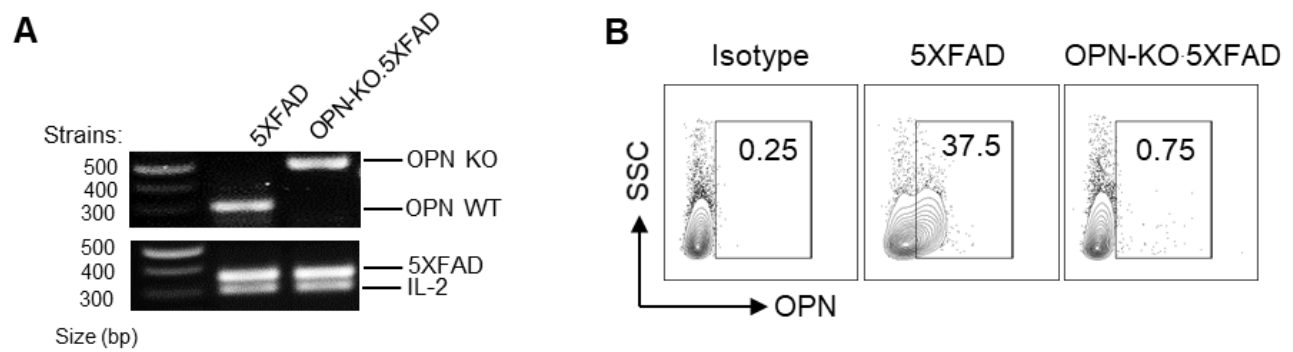

**Figure S2. Confirmation of OPN KO in OPN-KO.5XFAD mice.**

**(A)** PCR genotyping results of the indicated mouse strains: OPN-KO.5XFAD: 500 bp; OPN<sup>WT</sup>: 300 bp; 5XFAD transgene: 377 bp; IL-2 (internal positive control): 324 bp.

**(B)** Validation of OPN KO at the protein level in microglia of 9-mo old OPN-KO.5XFAD mice. Isotype control was used as negative control. Microglia from age-matched 5XFAD mice were used as positive controls. The contour plots were representative results from 3 independent experiments.

Microglial expression of canonical OPN receptors in 5XFAD mice

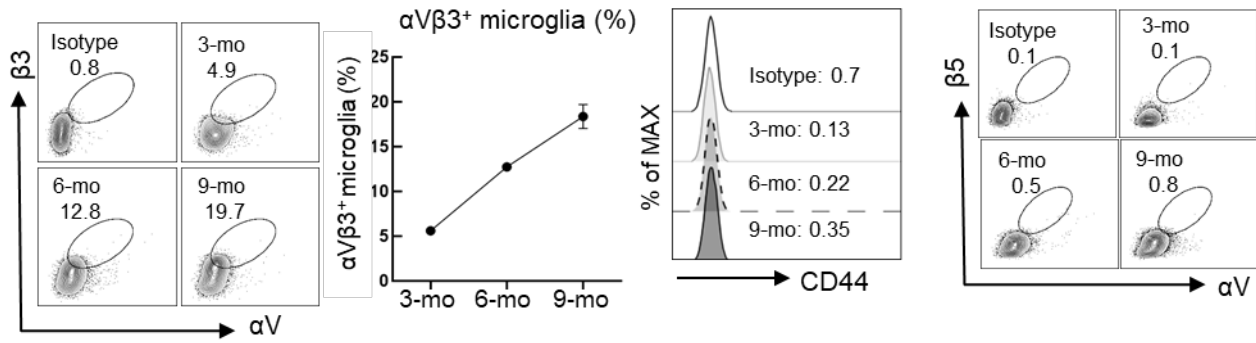

**Figure S3. Microglial expression of canonical OPN receptors in 5XFAD mice at different stages of disease.**

Flow cytometric analysis of microglial expression of  $\alpha V\beta 3$ , CD44 and  $\alpha V\beta 5$  in 5XFAD mice at the indicated ages during disease progression. Histogram of CD44 and contour plots of  $\alpha V\beta 3$  and  $\alpha V\beta 5$  are the representative results from 3 independent experiments.

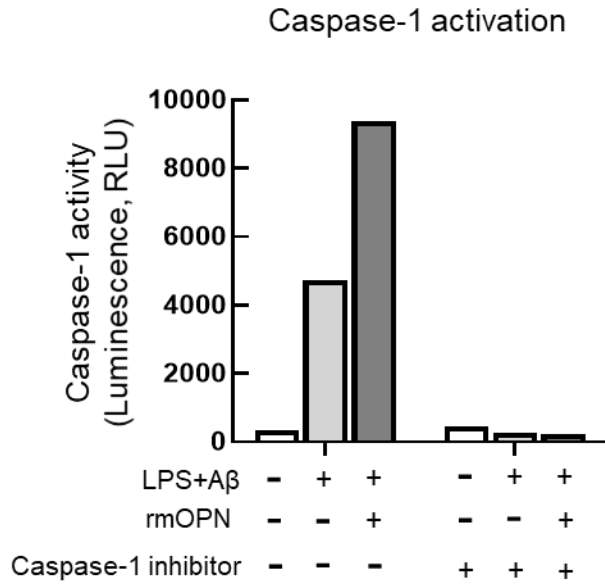

**Figure S4. Validation of the specificity of Caspase-1 activation.**

Intracellular Caspase-1 activity was measured by bioluminescent assay of microglia from 9-mo 5XFAD mice. Detection of the specificity of Caspase-1 activity was confirmed by a selective Caspase-1 inhibitor (Ac-YVAD-CHO, 1  $\mu$ M). Bar plots are representative results from 3 independent experiments.

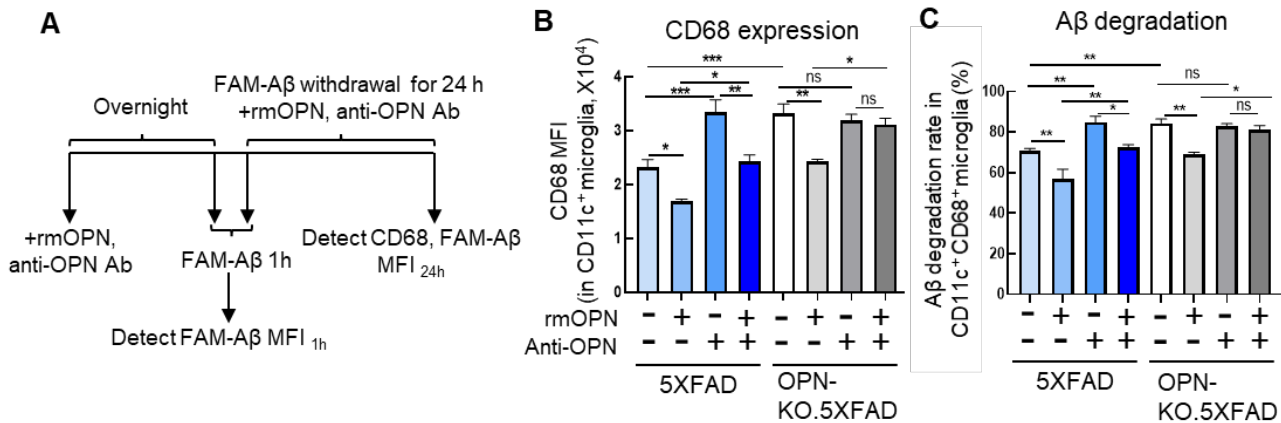

**Figure S5. In vitro analysis of OPN-dependent inhibition of lysosomal A $\beta$  degradation.**

**(A)** Protocol of in vitro analysis of OPN-dependent inhibition of lysosomal A $\beta$  degradation in CD11c<sup>+</sup> microglia from 9-mo old 5XFAD and OPN-KO.5XFAD mice.

**(B)** CD68 expression (MFI) in CD11c<sup>+</sup> microglia from 5XFAD and OPN-KO.5XFAD mice in the presence or absence of rmOPN and anti-OPN Ab (n=3). \*\*\*p < 0.001, \*\*p < 0.01, \*p < 0.05 by one-way ANOVA with Bonferroni's multiple comparisons test.

**(C)** Mean fluorescence intensity (MFI) of FAM-A $\beta$ <sub>1-42</sub> after 1 h incubation determined by flow cytometry in lysosomes of CD11c<sup>+</sup> microglia (CD11c<sup>+</sup>CD68<sup>+</sup>) were defined as A $\beta$  MFI<sub>1h</sub>. MFI of retained FAM-A $\beta$  in lysosomes of CD11c<sup>+</sup> microglia (CD11c<sup>+</sup>CD68<sup>+</sup>) 24 h after FAM-A $\beta$ <sub>1-42</sub> withdrawal was determined and defined as A $\beta$  MFI<sub>24h</sub>. CD11c<sup>+</sup> microglial A $\beta$  degradation rate (n=3) was calculated as (A $\beta$  MFI<sub>1h</sub> - A $\beta$  MFI<sub>24h</sub>) / A $\beta$  MFI<sub>1h</sub>. \*\*p < 0.01, \*p < 0.05 by one-way ANOVA with Bonferroni's multiple comparisons test. All data are presented as mean  $\pm$  s.e.m.

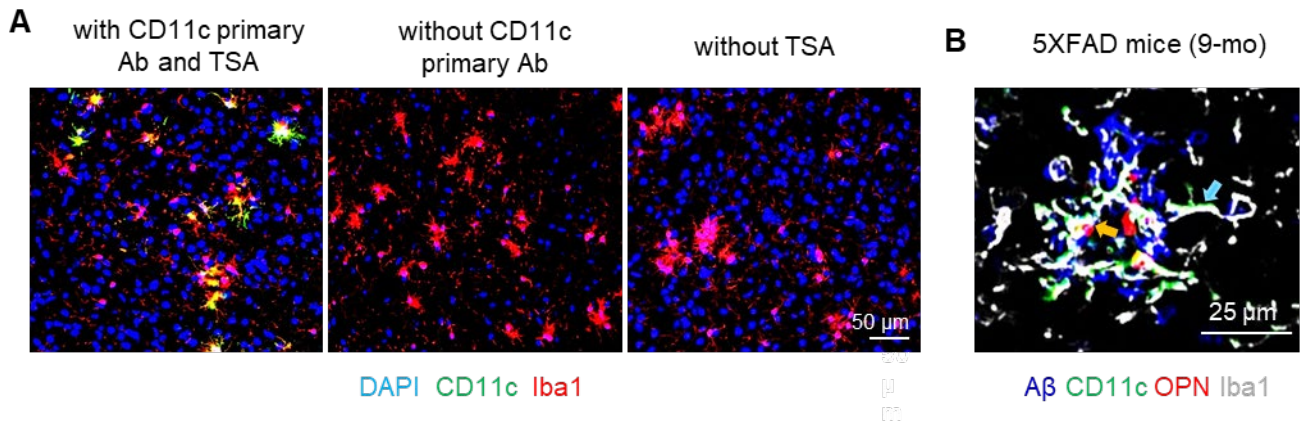

**Figure S6. Immunofluorescent staining of CD11c microglial subsets in brain cryosections of 5XFAD mice.**

**(A)** Immunofluorescent signal of microglial CD11c expression was validated in 9-mo old 5XFAD mice. Brain cryosections incubated without anti-CD11c primary Ab or Tyramide Signal Amplification (TSA) reagent were used as negative controls. Scale bar = 50  $\mu$ m.

**(B)** Representative immunofluorescent staining of CD11c<sup>+</sup>OPN<sup>+</sup> microglia (CD11c<sup>+</sup>OPN<sup>+</sup>Iba-1<sup>+</sup>, yellow arrow) and CD11c<sup>+</sup>OPN<sup>-</sup> microglia (CD11c<sup>+</sup>Iba-1<sup>+</sup>, cyan arrow) in brain sections of 9-mo old 5XFAD mice. Scale bar = 25  $\mu$ m.

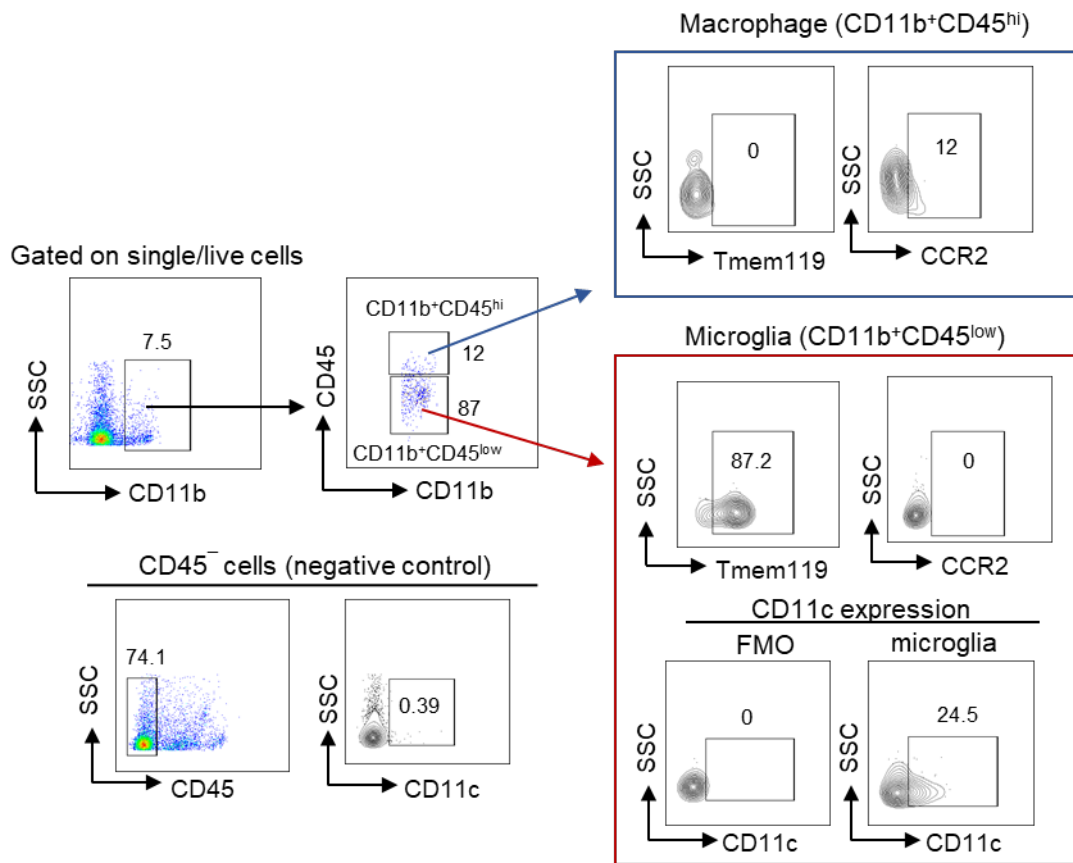

**Figure S7. Validation of microglial CD11c expression in 5XFAD mice by flow cytometry.**

Flow cytometric analysis of microglial CD11c expression in 9-mo old 5XFAD mice. CD11b<sup>+</sup> cells were gated on single/live cells. Microglia are identified as CD11b<sup>+</sup> CD45<sup>low</sup> Tmem119<sup>+</sup>CCR2<sup>-</sup> cells and macrophage are identified as CD11b<sup>+</sup>CD45<sup>hi</sup> Tmem119<sup>-</sup>CCR2<sup>+</sup> cells. The specificity of CD11c staining was confirmed using FMO negative control. Brain CD45<sup>-</sup> cells containing primarily non-immune cells that do not express CD11c were included as negative controls.



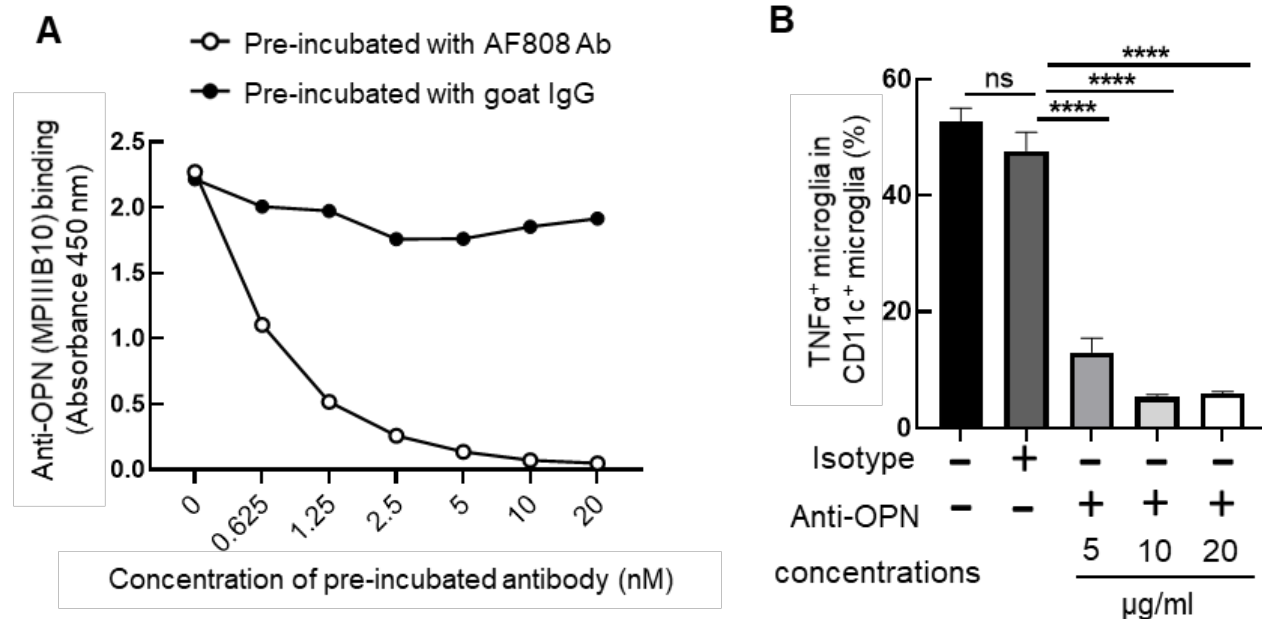

**Figure S8. Binding specificity and in vitro function of anti-OPN mAb (MPIIB10).**

**(A)** The binding specificity of anti-OPN mAb (clone: MPIIB10, isotype: mouse IgG1) to rmOPN was determined by competitive ELISA immunoassay. Plates coated with 2 μg/ml rmOPN (R&D) were pre-incubated with another anti-OPN Ab (clone: AF808, goat IgG) or its isotype goat IgG at graded concentrations followed by incubation with 200 nM anti-OPN mAb (MPIIB10).

**(B)** Microglia isolated from 9-mo old 5XFAD mice were incubated at increasing concentrations (5, 10, 20 μg/ml) of anti-OPN mAb (MPIIB10) or an isotype-matched (mouse IgG1) control for 24 hours followed by flow cytometric analysis of TNF-α production by CD11c<sup>+</sup> microglia (n=3). \*\*\*\*p < 0.0001, ns: not significant by one-way ANOVA with Bonferroni's multiple comparisons test. Data are presented as mean ± s.e.m.

**See Excel file**

**Dataset S1. Differentially expressed genes (DEGs) of CD11c<sup>+</sup> microglia from 9-mo old OPN-KO.5XFAD and 5XFAD mice.**

A full list of differentially expressed genes (DEGs) in CD11c<sup>+</sup> microglia from 9-mo old OPN-KO.5XFAD mice compared with 5XFAD mice identifies 2,985 DEGs. Gene expression was considered upregulated if  $\log_2FC > 1$  or downregulated if  $\log_2FC < -1$ . DEGs were considered significant with an FDR-adjusted p value  $< 0.05$ .

**Table S1. Summary of human samples included in the study.**

|                | N for ELISA | N for IF | Age (years $\pm$ SD) | Sex (F/M) | PMI (min $\pm$ SD) |
|----------------|-------------|----------|----------------------|-----------|--------------------|
| Normal (CDR=0) | 11          | 5        | 81.1 $\pm$ 9.6       | 6/5       | 787 $\pm$ 425      |
| MCI (CDR=0.5)  | 10          | 9        | 82.6 $\pm$ 9.4       | 6/5       | 730 $\pm$ 425      |
| AD (CDR>1)     | 11          | 8        | 82.7 $\pm$ 9.5       | 7/5       | 533 $\pm$ 237      |

PMI, Post-mortem Interval (min); CDR, Clinical Dementia Rating; IF, Immunofluorescence staining

Samples matched for age and sex were analyzed for OPN levels as measured by ELISA of frozen samples followed by immunofluorescence staining for Iba-1/CD11c/OPN (fixed, paraffin embedded sections).

**Table S2. Characterization of frozen and fixed human samples.**

|        | Subject number | Age  | Sex    | PMI (min) | CDR | Used for ELISA | Used for IF | Plaque rating <sup>1</sup> | Tangle rating <sup>1</sup> |
|--------|----------------|------|--------|-----------|-----|----------------|-------------|----------------------------|----------------------------|
| Normal | 23983          | 79   | Male   | 964       | 0   | +              |             | 1                          | 0                          |
|        | 36472          | 89   | Female | 353       | 0   | +              |             | 1                          | 0                          |
|        | 57242          | 85   | Female | 320       | 0   | +              | +           | 1                          | 0                          |
|        | 61911          | 95   | Female | 456       | 0   | +              |             | 0                          | 0                          |
|        | 80875          | 83   | Male   | 834       | 0   | +              |             | 1                          | 0                          |
|        | 201539         | 85   | Male   | 488       | 0   | +              |             | 3                          | 1                          |
|        | 395695         | 91   | Female | 290       | 0   | +              | +           | 0                          | 0                          |
|        | 503571         | 81   | Female | 1364      | 0   | +              |             | 0                          | 0                          |
|        | 576228         | 72   | Male   | 986       | 0   | +              | +           | 0                          | 0                          |
|        | 808460         | 66   | Male   | 1390      | 0   | +              | +           | 0                          | 0                          |
|        | 921781         | 66   | Female | 1211      | 0   | +              | +           | 0                          | 0                          |
| MCI    | 13090          | 71   | Male   | 1285      | 0.5 | +              | +           | 1                          | 0                          |
|        | 24420          | 83   | Male   | 740       | 0.5 | +              |             | 0                          | 0                          |
|        | 27409          | 68   | Female | 1155      | 0.5 | +              | +           | 0                          | 0                          |
|        | 38519          | 92   | Female | 225       | 0.5 | +              | +           | 3                          | 3                          |
|        | 46426          | 68   | Male   | 225       | 0.5 | +              |             | 0                          | 0                          |
|        | 83284          | 89   | Female | 495       | 0.5 | +              | +           | 0                          | 0                          |
|        | 271140         | 89   | Male   | 776       | 0.5 | +              | +           | 1                          | 0                          |
|        | 582757         | 87   | Male   | 925       | 0.5 | +              | +           | 0                          | 0                          |
|        | 604571         | 93   | Female | 248       | 0.5 | +              | +           | 1                          | 0                          |
|        | 754833         | 82   | Female | 553       | 0.5 | +              | +           | 5                          | 3                          |
|        | 852223         | 87   | Female | 1398      | 0.5 |                | +           | 3                          | 1                          |
| AD     | 5323           | 91   | Female | 420       | 2   | +              |             | 5                          | 5                          |
|        | 29188          | 91   | Female | 285       | 2   | +              | +           | 3                          | 1                          |
|        | 1100           | 84   | Female | 480       | 3   | +              |             | 3                          | 1                          |
|        | 64891          | 68   | Male   | 1075      | 3   | +              | +           | 5                          | 5                          |
|        | 74931          | 79   | Female | 390       | 3   | +              | +           | 5                          | 5                          |
|        | 354049         | 85   | Male   | 392       | 3   | +              | +           | 5                          | 1                          |
|        | 639732         | 69   | Female | 500       | 3   | +              | +           | 5                          | 5                          |
|        | 762124         | 72   | Male   | 375       | 3   |                | +           | 3                          | 5                          |
|        | 782872         | 99   | Female | 360       | 3   | +              |             | 1                          | 0                          |
|        | 31742          | 87   | Female | 885       | 4   | +              | +           | 5                          | 5                          |
|        | 39413          | 87   | Male   | 540       | 5   | +              | +           | 5                          | 5                          |
| 524179 | 80             | Male | 688    | 5         | +   |                | 5           | 5                          |                            |

<sup>1</sup>Determined postmortem by a neuropathologist before storage of samples in the Mount Sinai brain bank. PMI: Post-mortem Interval (min); CDR: Clinical Dementia Rating; IF: Immunofluorescence staining

**Table S3. Characterization of frozen and fixed human samples.**

Detailed characterization of all human samples included in the study.

**See MP4 file**

**Movie S1. Confocal 3D images of human brain section stained for CD11c<sup>+</sup>OPN<sup>+</sup>Iba-1<sup>+</sup> microglia from a normal control.**

Microglia shown in the images were stained for Iba1 (red), CD11c (green) and OPN (cyan). 3D images consist of 34 Z stacks, each slice 0.29  $\mu\text{m}$  thick accumulating to a total of 9.85  $\mu\text{m}$  in depth for the entire image. The image was acquired at a magnification of  $\times 63$  with a zoom in effect.

**See MP4 file**

**Movie S2. Confocal 3D images of human brain section stained for CD11c<sup>+</sup>OPN<sup>+</sup>Iba-1<sup>+</sup> microglia from an AD patient.**

Microglia represented in the images were stained for Iba1 (red), CD11c (green) and OPN (cyan). The 3D image consists of 29 Z stacks, each slice 0.29  $\mu\text{m}$  thick accumulating to a total of 8.36  $\mu\text{m}$  in depth for the entire image. The image was acquired at a magnification of  $\times 63$  with a zoom in effect.
